# Supplementary material for: Health‐Related Quality of Life in Older Patients With Advanced Heart Failure: Findings From the SUSTAIN‐IT Study
Source: PubMed Central journal article supplement — J Am Heart Assoc. 2022 Feb 12;11(4):e024385. doi: 10.1161/JAHA.121.024385 (PMC9245796; doi:10.1161/jaha.121.024385), 2022-02-12
Supplement: JAH3-11-e024385-s001.pdf [file JAH3-11-e024385-s001.pdf]

# **SUPPLEMENTAL MATERIAL**

**Table S1. Assessments Completed by Patients at Baseline.**

| Measure                                                                     | Description of Measure                                                                                                                                                                                                                                                                                                                                                                                                                                                                                                                                                                                                            |
|-----------------------------------------------------------------------------|-----------------------------------------------------------------------------------------------------------------------------------------------------------------------------------------------------------------------------------------------------------------------------------------------------------------------------------------------------------------------------------------------------------------------------------------------------------------------------------------------------------------------------------------------------------------------------------------------------------------------------------|
| <b>Self-report Measures</b>                                                 |                                                                                                                                                                                                                                                                                                                                                                                                                                                                                                                                                                                                                                   |
| <b>EQ-5D-3L</b> <sup>19</sup>                                               | <p><b>Generic Overall Health-related Quality of Life (HRQOL) and dimensions:</b></p> <ul style="list-style-type: none"> <li>• Single item rating current health status uses a vertical graduated (0-100) 20cm visual analog scale (VAS). Mean VAS scores are calculated.</li> <li>• 5 dimensions: mobility, self-care, usual activities, pain/discomfort, and anxiety/ depression with 3 levels of response (no problems, some/moderate problems, and extreme problems).</li> </ul>                                                                                                                                               |
| <b>Kansas City Cardiomyopathy Questionnaire (KCCQ-12)</b> <sup>20</sup>     | <p><b>Heart failure-specific Overall HRQOL and domains:</b></p> <ul style="list-style-type: none"> <li>• 12-item disease specific questionnaire that measures HRQOL in patients with heart failure.</li> <li>• Four domains: physical limitations, symptom frequency, social limitations, and quality of life, and an overall summary score, combining the domains. Responses are set up as Likert scales. Scale scores are transformed to 0-100; higher scores = better health-related quality of life.</li> </ul>                                                                                                               |
| <b>Personal Health Questionnaire (PHQ-8)</b> <sup>22</sup>                  | <p><b>Mental HRQOL domain:</b></p> <ul style="list-style-type: none"> <li>• 8-item screen for depression, based on the first eight criteria on which the diagnosis of DSM-IV depressive disorder is based.</li> <li>• Subjects indicate how often they have been bothered by depressive symptoms over the previous two weeks on a scale of 0=not at all to 3=nearly every day.</li> <li>• A summary score is calculated, with possible scores ranging from 0 to 24. Higher scores indicate higher levels of depressive symptoms. Scores <math>\geq 10</math> indicate the need for clinical assessment and management.</li> </ul> |
| <b>State-Trait Anxiety Inventory -State form (STAI-State)</b> <sup>23</sup> | <p><b>Mental HRQOL domain:</b></p> <ul style="list-style-type: none"> <li>• 20 self-report items assessing current levels of anxiety.</li> <li>• Subjects use a four-point Likert scale ranging from (1) not at all to (4) very much so. Higher scores = greater state anxiety.</li> </ul>                                                                                                                                                                                                                                                                                                                                        |
| <b>Performance-based Measures</b>                                           |                                                                                                                                                                                                                                                                                                                                                                                                                                                                                                                                                                                                                                   |
| <b>Six minute walk test (6MWT)</b> <sup>25</sup>                            | <p><b>Physical domain:</b></p> <ul style="list-style-type: none"> <li>• Measure of physical functional capacity, consists of having a patient walk for 6 minutes in an enclosed hallway, free of traffic and distractions, with distance measured in meters.</li> </ul>                                                                                                                                                                                                                                                                                                                                                           |

|                                                          |                                                                                                                                                                                                                                                                                                                                                                                                                                                                                                                       |
|----------------------------------------------------------|-----------------------------------------------------------------------------------------------------------------------------------------------------------------------------------------------------------------------------------------------------------------------------------------------------------------------------------------------------------------------------------------------------------------------------------------------------------------------------------------------------------------------|
|                                                          | <ul style="list-style-type: none"> <li>Patients are instructed to walk steadily to cover as much distance as possible during the 6 minutes. At the end of the walk, the total time (if less than 6 minutes) and distance covered is recorded. If a patient is bed-bound, a score of "0" may be assigned.<sup>36</sup></li> </ul>                                                                                                                                                                                      |
| <b>5-meter gait speed<sup>26</sup></b>                   | <b>Frailty:</b> <ul style="list-style-type: none"> <li>Clinical marker of frailty, used in an elderly cardiac surgical population.<sup>26</sup></li> <li>Conducted in a well-lit, unobstructed hallway with markings at 0 and 5 meters.</li> <li>Patients are instructed to walk at a comfortable pace; canes and walkers are allowed. If a patient cannot walk, data are considered missing. This test is performed three times and averaged. Slower gait speed = longer walk time over 5 meters (m/sec).</li> </ul> |
| <b>Interview Administered Measure</b>                    |                                                                                                                                                                                                                                                                                                                                                                                                                                                                                                                       |
| <b>Montreal Cognitive Assessment (MoCA)<sup>24</sup></b> | <b>Cognitive dysfunction:</b> <ul style="list-style-type: none"> <li>10-minute screening instrument (worst-to-best total score range=0-30), includes 7 cognitive domains.</li> <li>Cognitive dysfunction: (MoCA total score less than 26).</li> </ul>                                                                                                                                                                                                                                                                 |

**Table S2. Completion of Assessments at Baseline.**

| <b>Patient Baseline Forms</b>              | <b>HT* Candidates<br/>(with and without MCS)<br/>Completed/Expected (%)</b> | <b>Long-term MCS†<br/>Candidates<br/>Completed/Expected (%)</b> | <b>Total<br/>Completed/Expected (%)</b> |
|--------------------------------------------|-----------------------------------------------------------------------------|-----------------------------------------------------------------|-----------------------------------------|
| <b>Self-report Assessments</b>             |                                                                             |                                                                 |                                         |
| EQ-5D-3L‡                                  | 237/239 (99%)                                                               | 142/154 (92%)                                                   | 379/393 (96%)                           |
| KCCQ-12§                                   | 237/239 (99%)                                                               | 143/154 (93%)                                                   | 380/393 (97%)                           |
| PHQ-8¶                                     | 235/239 (98%)                                                               | 147/154 (95%)                                                   | 382/393 (97%)                           |
| STAI-state#                                | 235/239 (98%)                                                               | 147/154 (95%)                                                   | 382/393 (97%)                           |
| <b>Interviewer-administered Assessment</b> |                                                                             |                                                                 |                                         |
| MoCA**                                     | 218/239 (91%)                                                               | 141/154 (92%)                                                   | 359/393 (91%)                           |
| <b>Performance-based Assessments</b>       |                                                                             |                                                                 |                                         |
| Five Meter Gait Speed                      | 146/239 (61%)                                                               | 37/154 (24%)                                                    | 183/393 (47%)                           |
| Six Minute Walk Test                       | 158/239 (66%)                                                               | 51/154 (33%)                                                    | 209/393 (53%)                           |

\* HT = heart transplantation

† MCS = mechanical circulatory support

‡ EQ-5D-3L = EuroQol-5 dimension-3L

§ KCCQ-12 = Kansas City Cardiomyopathy Questionnaire-12

¶ PHQ-8 = Personal Health Questionnaire

# STAI-state = State-Trait Anxiety Inventory-state form

\*\* MoCA = Montreal Cognitive Assessment.

**Table S3. Patient Baseline Reasons for Missing Data for Performance-based Measures.**

| Variable                                              | Available sample total (by group) | Total sample (n=393) | Long-term MCS* candidates (n=154) | HT† candidates with MCS (n=118) | HT candidates without MCS (n=121) | p-value |
|-------------------------------------------------------|-----------------------------------|----------------------|-----------------------------------|---------------------------------|-----------------------------------|---------|
| <u>Six Minute Walk Missing Status, No. (%)</u>        | 184(103,29,52)                    |                      |                                   |                                 |                                   | 0.67    |
| . Form Incomplete/Reason Not Provided                 |                                   | 1 (1%)               | 1 (1%)                            | 0 (0%)                          | 0 (0%)                            |         |
| . Test Not Done (Reason Provided)                     |                                   | 183 (99%)            | 102 (99%)                         | 29 (100%)                       | 52 (100%)                         |         |
| <u>Reason Six Minute Walk Not Done, No. (%)</u>       | 183(102,29,52)                    |                      |                                   |                                 |                                   | 0.030   |
| . Patient Refused, Unable to Walk                     |                                   | 30 (16%)             | 22 (22%)                          | 3 (10%)                         | 5 (10%)                           |         |
| . Patient Refused, Too Tired/Sick                     |                                   | 89 (49%)             | 50 (49%)                          | 13 (45%)                        | 26 (50%)                          |         |
| . Patient Refused, No Time/Too Busy                   |                                   | 6 (3%)               | 1 (1%)                            | 1 (3%)                          | 4 (8%)                            |         |
| . Patient Refused, No Reason Given                    |                                   | 1 (1%)               | 1 (1%)                            | 0 (0%)                          | 0 (0%)                            |         |
| . Did Not Approach Due to Patient Health Status       |                                   | 26 (14%)             | 17 (17%)                          | 2 (7%)                          | 7 (13%)                           |         |
| . Coordinator Forgot/No Time                          |                                   | 2 (1%)               | 1 (1%)                            | 0 (0%)                          | 1 (2%)                            |         |
| . Collected For INTERMACS‡ Within Visit Window        |                                   | 5 (3%)               | 4 (4%)                            | 1 (3%)                          | 0 (0%)                            |         |
| . Other                                               |                                   | 24 (13%)             | 6 (6%)                            | 9 (31%)                         | 9 (17%)                           |         |
| <u>Five Meter Gait Speed Missing Status, No. (%)</u>  | 210(117,40,53)                    |                      |                                   |                                 |                                   | 0.67    |
| . Form Incomplete/Reason Not Provided                 |                                   | 1 (0%)               | 1 (1%)                            | 0 (0%)                          | 0 (0%)                            |         |
| . Test Not Done (Reason Provided)                     |                                   | 209 (100%)           | 116 (99%)                         | 40 (100%)                       | 53 (100%)                         |         |
| <u>Reason Five Meter Gait Speed Not Done, No. (%)</u> | 209(116,40,53)                    |                      |                                   |                                 |                                   | 0.002   |
| . Patient Refused, Unable to Walk                     |                                   | 32 (15%)             | 25 (22%)                          | 3 (8%)                          | 4 (8%)                            |         |
| . Patient Refused, Too Tired/Sick                     |                                   | 101 (48%)            | 59 (51%)                          | 16 (40%)                        | 26 (49%)                          |         |
| . Patient Refused, No Time/Too Busy                   |                                   | 8 (4%)               | 1 (1%)                            | 3 (8%)                          | 4 (8%)                            |         |
| . Patient Refused, No Reason Given                    |                                   | 2 (1%)               | 2 (2%)                            | 0 (0%)                          | 0 (0%)                            |         |
| . Did Not Approach Due to Patient Health Status       |                                   | 31 (15%)             | 20 (17%)                          | 4 (10%)                         | 7 (13%)                           |         |
| . Coordinator Forgot/No Time                          |                                   | 5 (2%)               | 2 (2%)                            | 2 (5%)                          | 1 (2%)                            |         |
| . Other                                               |                                   | 30 (14%)             | 7 (6%)                            | 12 (30%)                        | 11 (21%)                          |         |

\* MCS = mechanical circulatory support

† HT = heart transplantation

‡ INTERMACS = Interagency Registry for Mechanically Assisted Circulatory Support

**Table S4. Patient Baseline EQ-5D-3L Dimension Scores by 3 Levels of Problems.**

| Variable                                            | Available sample total (by group) | Total sample (n=393) | Long-term MCS* candidates (n=154) | HT <sup>†</sup> candidates with MCS (n=118) | HT candidates without MCS (n=121) | p-value |
|-----------------------------------------------------|-----------------------------------|----------------------|-----------------------------------|---------------------------------------------|-----------------------------------|---------|
| EQ-5D-3L <sup>‡</sup> Mobility, No. (%)             | 380(143,118,119)                  |                      |                                   |                                             |                                   | <0.001  |
| . No Problems in Walking About                      |                                   | 170 (45%)            | 51 (36%)                          | 64 (54%)                                    | 55 (46%)                          |         |
| . Some Problems in Walking About                    |                                   | 179 (47%)            | 68 (48%)                          | 54 (46%)                                    | 57 (48%)                          |         |
| . Confined to Bed                                   |                                   | 31 (8%)              | 24 (17%)                          | 0 (0%)                                      | 7 (6%)                            |         |
| EQ-5D-3L Self-Care, No. (%)                         | 380(143,118,119)                  |                      |                                   |                                             |                                   | <0.001  |
| . No Problems with Self-Care                        |                                   | 256 (67%)            | 76 (53%)                          | 86 (73%)                                    | 94 (79%)                          |         |
| . Some Problems Washing or Dressing Myself          |                                   | 101 (27%)            | 46 (32%)                          | 32 (27%)                                    | 23 (19%)                          |         |
| . Unable to Wash or Dress Myself                    |                                   | 23 (6%)              | 21 (15%)                          | 0 (0%)                                      | 2 (2%)                            |         |
| EQ-5D-3L Usual Activities, No. (%)                  | 381(143,118,120)                  |                      |                                   |                                             |                                   | <0.001  |
| . No Problems with Performing My Usual Activities   |                                   | 119 (31%)            | 30 (21%)                          | 47 (40%)                                    | 42 (35%)                          |         |
| . Some Problems with Performing My Usual Activities |                                   | 193 (51%)            | 65 (45%)                          | 66 (56%)                                    | 62 (52%)                          |         |
| . Unable to Perform My Usual Activities             |                                   | 69 (18%)             | 48 (34%)                          | 5 (4%)                                      | 16 (13%)                          |         |
| EQ-5D-3L Pain/Discomfort, No. (%)                   | 380(143,118,119)                  |                      |                                   |                                             |                                   | 0.23    |
| . No Pain or Discomfort                             |                                   | 186 (49%)            | 69 (48%)                          | 64 (54%)                                    | 53 (45%)                          |         |
| . Moderate Pain or Discomfort                       |                                   | 183 (48%)            | 67 (47%)                          | 52 (44%)                                    | 64 (54%)                          |         |
| . Extreme Pain or Discomfort                        |                                   | 11 (3%)              | 7 (5%)                            | 2 (2%)                                      | 2 (2%)                            |         |
| EQ-5D-3L Anxiety/Depression, No. (%)                | 380(143,118,119)                  |                      |                                   |                                             |                                   | 0.08    |
| . Not Anxious or Depressed                          |                                   | 245 (64%)            | 81 (57%)                          | 77 (65%)                                    | 87 (73%)                          |         |
| . Moderately Anxious or Depressed                   |                                   | 126 (33%)            | 57 (40%)                          | 38 (32%)                                    | 31 (26%)                          |         |
| . Extremely Anxious or Depressed                    |                                   | 9 (2%)               | 5 (3%)                            | 3 (3%)                                      | 1 (1%)                            |         |

- \* MCS = mechanical circulatory support
- † HT = heart transplantation
- ‡ EQ-5D-3L = EuroQol -5D-3L Questionnaire



**Table S5. Factors Associated with Health-related Quality of Life in Patients Awaiting Heart Transplantation and Long-term Mechanical Circulatory Support using Univariable Linear Regression Models.**

| Effect                                                      | n Available | Effect Size | 95% Confidence Interval |       | p-value |
|-------------------------------------------------------------|-------------|-------------|-------------------------|-------|---------|
| <b>Outcome: EQ-5D* VAS Score</b>                            |             |             |                         |       |         |
| Sample (Reference = HT <sup>+</sup> candidates without MCS) |             |             |                         |       |         |
| • Long-term MCS <sup>+</sup> candidates                     | 382         | -8.5        | -13.8                   | -3.3  | 0.001   |
| • HT candidates with MCS                                    |             | 13.7        | 8.2                     | 19.1  | <0.001  |
| Age, years                                                  | 382         | -0.6        | -1.2                    | -0.1  | 0.014   |
| Male                                                        | 382         | -4.0        | -9.8                    | 1.9   | 0.18    |
| Race (White)                                                | 380         | -4.9        | -11.2                   | 1.3   | 0.12    |
| Education > High School                                     | 357         | -2.9        | -8.0                    | 2.2   | 0.27    |
| History of Smoking                                          | 379         | 4.1         | -1.0                    | 9.2   | 0.11    |
| Arrhythmia                                                  | 382         | -5.3        | -10.0                   | -0.5  | 0.030   |
| Kidney Disease                                              | 382         | -5.4        | -10.2                   | -0.5  | 0.030   |
| Diabetes                                                    | 382         | -5.5        | -10.2                   | -0.8  | 0.021   |
| Hypertension                                                | 382         | -3.7        | -8.5                    | 1.1   | 0.12    |
| NYHA Class at Enrollment (Reference = 1)                    |             |             |                         |       |         |
| • 2                                                         | 371         | -8.3        | -19.9                   | 3.2   | 0.16    |
| • 3                                                         |             | -21.4       | -32.2                   | -10.6 | <0.001  |
| • 4                                                         |             | -28.7       | -39.3                   | -18.2 | <0.001  |
| Patient Six Minute Walk (meters)<br>(Reference is >378)     |             |             |                         |       |         |

|                                                         |     |       |       |       |        |
|---------------------------------------------------------|-----|-------|-------|-------|--------|
| • 0                                                     | 381 | -23.1 | -30.0 | -16.4 | <0.001 |
| • 1 - 183                                               |     | -18.6 | -26.0 | -11.3 | <0.001 |
| • 184 - 300                                             |     | -9.6  | -17.4 | -1.8  | 0.016  |
| • 301 - 378                                             |     | -2.5  | -10.0 | 4.9   | 0.50   |
| PHQ-8 <sup>§</sup> Total Score                          | 378 | -2.0  | -2.4  | -1.5  | <0.001 |
| STAI <sup>  </sup> Total Score                          | 378 | -0.6  | -0.8  | -0.4  | <0.001 |
| MoCA <sup>#</sup> Total Score                           | 351 | 0.9   | 0.1   | 1.6   | 0.022  |
| <b>Outcome: KCCQ-12** Overall Summary Score</b>         |     |       |       |       |        |
| Sample (Reference = HT candidates without MCS)          |     |       |       |       |        |
| • Long-term MCS candidates                              | 383 | -13.6 | -18.7 | -8.5  | <0.001 |
| • HT candidates with MCS                                |     | 11.0  | 5.6   | 16.4  | <0.001 |
| Age, years                                              | 383 | -1.0  | -1.5  | -0.4  | <0.001 |
| Education > High School                                 | 358 | -3.4  | -8.5  | 1.8   | 0.20   |
| Insurance Type: Private Insurance vs Medicare/Medicaid  | 383 | 5.6   | 0.8   | 10.4  | 0.021  |
| Currently Working                                       | 359 | 8.4   | 1.9   | 14.8  | 0.011  |
| History of Smoking                                      | 380 | 5.1   | -0.01 | 10.2  | 0.050  |
| Diabetes                                                | 383 | -5.7  | -10.3 | -1.0  | 0.018  |
| NYHA Class at Enrollment (Reference = 1)                |     |       |       |       |        |
| • 2                                                     | 372 | -11.1 | -21.9 | -0.3  | 0.043  |
| • 3                                                     |     | -25.2 | -35.2 | -15.1 | <0.001 |
| • 4                                                     |     | -38.3 | -48.2 | -28.5 | <0.001 |
| Patient Six Minute Walk (meters)<br>(Reference is >378) |     |       |       |       |        |
| • 0                                                     | 382 | 2.8   | -2.8  | 8.3   | 0.32   |
| • 1 - 183                                               |     | 17.6  | 11.6  | 23.6  | <0.001 |

|                   |     |      |      |      |        |
|-------------------|-----|------|------|------|--------|
| • 184 - 300       |     | 26.1 | 20.5 | 31.8 | <0.001 |
| • 301 - 378       |     | 35.2 | 29.2 | 41.2 | <0.001 |
| PHQ-8 Total Score | 379 | -2.9 | -3.3 | -2.6 | <0.001 |
| STAI Total Score  | 379 | -0.8 | -1.0 | -0.7 | <0.001 |
| MoCA Total Score  | 352 | 1.77 | 1.0  | 2.4  | <0.001 |

\* EQ-5D VAS = EuroQol visual analog scale

† HT = heart transplantation

‡ MCS = mechanical circulatory support

§ PHQ-8 = Personal Health Questionnaire-8

|| STAI-state = State-Trait Anxiety Inventory-state form

# MoCA = Montreal Cognitive Assessment

\*\* KCCQ-12 = Kansas City Cardiomyopathy Questionnaire

**Figure S1. Histogram for the three groups of candidates as individual overlays, with a density curve that represents the entire cohort.**

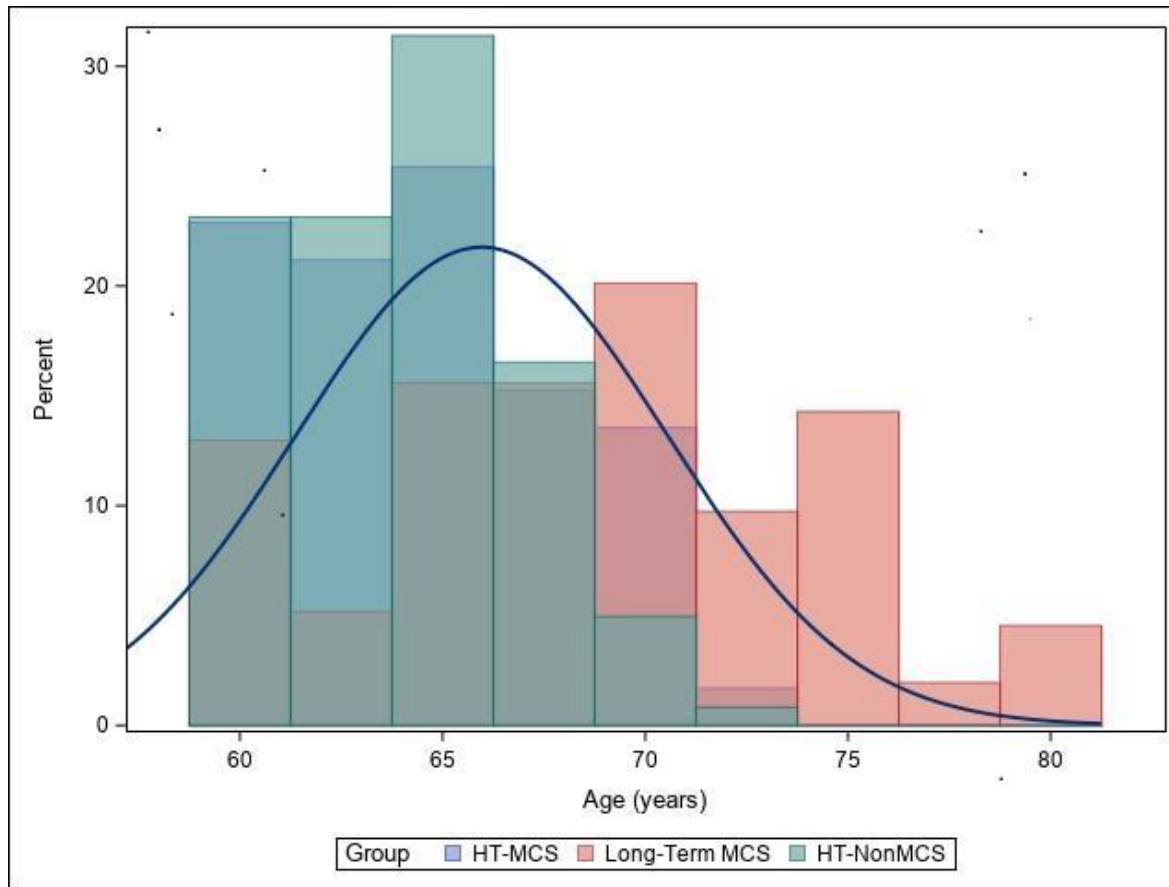

HT-MCS = heart transplant candidate with mechanical circulatory support prior to transplantation, Long-term MCS = advanced heart failure patient prior to long-term mechanical circulatory support, and HT-NonMCS = heart transplant candidate without mechanical circulatory support prior to transplantation.
